# Supplementary material
Source: publisher figshare collection journal article supplement (https://karger.figshare.com/ndownloader/files/30448698)
Supplement: Supplementary file 1 [file 30448698]

**Supplementary Information**

**Synbindin downregulation participates in slit diaphragm dysfunction**

Veniamin Ivanov, Yoshiyasu Fukusumi, Ying Zhang, Hidenori Yasuda, Meiko Kitazawa & Hiroshi Kawachi

Department of Cell Biology, Kidney Research Center, Niigata University Graduate School of Medical and Dental Sciences

**Correspondence to;**

Hiroshi Kawachi, MD, PhD.

Department of Cell Biology, Kidney Research Center, Niigata University Graduate School of Medical and Dental Sciences, Niigata, 951-8510, Japan.

E-mail : kawachi@med.niigata-u.ac.jp.

Phone : +81-25-227-2159, Fax : +81-25-227-0770

**Supplemental Table 1**. Antibodies used in this study.

| Antibodies | References or suppliers | catalog number |
| --- | --- | --- |
| mouse anti-RECA1 antibody | Serotec, Oxford, UK | MCA970 |
| mouse anti-Thy1.1 antibody | Ref. 20 |  |
| mouse anti-integrin-a3 | Santa Cruz Biotechnology, Dallas, TX, USA | sc-7019 |
| mouse anti-podocalyxin antibody | Ref. 21 |  |
| mouse anti-nephrin antibody | Ref. 15 |  |
| goat anti-ephrin-B1 antibody | R&D Systems, Minneapolis, MN, USA | AF473 |
| FITC-conjugated swine anti-rabbit Igs | DAKO, Glostrup, Denmark | F0205 |
| TRITC-conjugated rabbit anti-mouse Igs | DAKO, Glostrup, Denmark | R0270 |
| TRITC-conjugated rabbit anti-goat IgG | Southern Biotech, Birmingham, AL, USA | 6160-03 |

**Supplemental Table 2. Primers used in this study.**

| Molecule | Primer sequence (5`- 3`) | Product size (bp) | Accession No. |
| --- | --- | --- | --- |
| Synbindin  (rat) | Sense: CTG GCC TCT ATG TTC CAC TCG C  Anti-sence: AGG TTT TGG TCA AAT AGC TC | 275 | NM_001003708.1 |
| Syndecan-2 (rat) | Sense: ATG CGG GTA CGA GCC ACG TCC  Anti-sence: ATA AGC TCC TGA GCC AGA GGC AG | 210 | NM_013082.4 |
| Syndecan-4 (rat) | Sense: AGG TGA TTT CAC CCT TGG TGC  Anti-sence: TGG GTT TCT TGC CCA AGT CG | 330 | NM_012649.3 |
| CASK  (rat) | Sense: AGT GAA GCT GTA GCC AGT CAC  Anti-sence: TCC TTG GTT CCG TAG AAA GGC | 332 | NM_022184.1 |
| Synbindin  (human) | Sense: CCA GAC ACT GAC AGG GAT CAA G  Anti-sence: CTA TGA CCC AGG TCC AAA AGT TCC | 220 | NM_016146.6 |
| Syndecan-2  (human) | Sense: GTC TGG CTC GGG AGC TGA TG  Anti-sence: AGC AAT GAC AGC TGC TAG GAC | 292 | NM_002998.4 |
| Syndecan-4  (human) | Sense: TTG TCC ATC CCT TGG TGC CTC  Anti-sence: CAT TGG TGG GGG CTT TCT TG | 351 | NM_002999.4 |
| Podocalyxin  (human) | Sense: ACC CAC CGA TAC CCC AAA ACA C  Anti-sence: GGC AGG GAG CTT AGT GTG AAT AG | 294 | NM_001018111.3 |
| CASK  (human) | Sense: ATC TAA AGC GGG AAG CCA GTA TC  Anti-sence: TGT TCC AAC ACG TCC TCC AG | 374 | NM_003688.3 |
| Integrin-a3  (human) | Sense: GCA GGC AGA GTT CTG GTC TG  Anti-sence: CTT GCG CTG AAT CAT GTA GCT G | 291 | NM_002204.4 |
| Nephrin  (human) | Sense: AGC TCC TTC TAT GGC CTC AAC GTA CTG T  Anti-sence: GCG CGG GTC ACA TTC CAC AGA T | 233 | NM_004646.4 |
| Ephrin-B1  (human) | Sense: AAG AAC CTG GAG CCC GTA TC  Anti-sence: GGC TTC CAT TGG ATG TTG AGG | 337 | NM_004429.5 |
| GAPDH  (rat) | Sense: CTC TAC CCA CGG CAA GTT CAA  Anti-sence: GGA TGA CCT TGC CCA CAG C | 515 | NM_017008.4 |
| GAPDH  (human) | Sense: TTC CAC CCA TGG CAA ATT CCA  Anti-sence: GGA TGA CCT TGC CCA CAG C | 515 | NM_002046.7 |
